# Supplementary material for: The effect of different interfaces and confinement on the structure of the ionic liquid 1-butyl-3-methylimidazolium bis(trifluoromethylsulfonyl)imide entrapped in cationic and anionic reverse micelles
Source: Royal Society of Chemistry journal article supplement (doi:10.1039/c2cp23481e), 2012-01-01
Supplement: c2cp23481e.pdf [file c2cp23481e.pdf]

## Supplementary Information

**The Effect of Different Interfaces and Confinement on the Structure of the  
Ionic Liquid 1-butyl-3-methylimidazolium bis(trifluoromethylsulfonyl)imide  
Entrapped in Cationic and Anionic Reverse Micelles.**

Darío D. Ferreyra, N. Mariano Correa, Juana J. Silber, R. Darío Falcone\*

[\*] Dr. R. Darío Falcone. Corresponding-Author,

Departamento de Química. Universidad Nacional de Río Cuarto. Agencia Postal # 3.

C.P. X5804BYA Río Cuarto. ARGENTINA

E-mail: [rfalcone@exa.unrc.edu.ar](mailto:rfalcone@exa.unrc.edu.ar)

Darío D. Ferreyra, Dr. N. Mariano Correa, Prof. Juana J. Silber,

Departamento de Química. Universidad Nacional de Río Cuarto. Agencia Postal # 3.

C.P. X5804BYA Río Cuarto. ARGENTINA

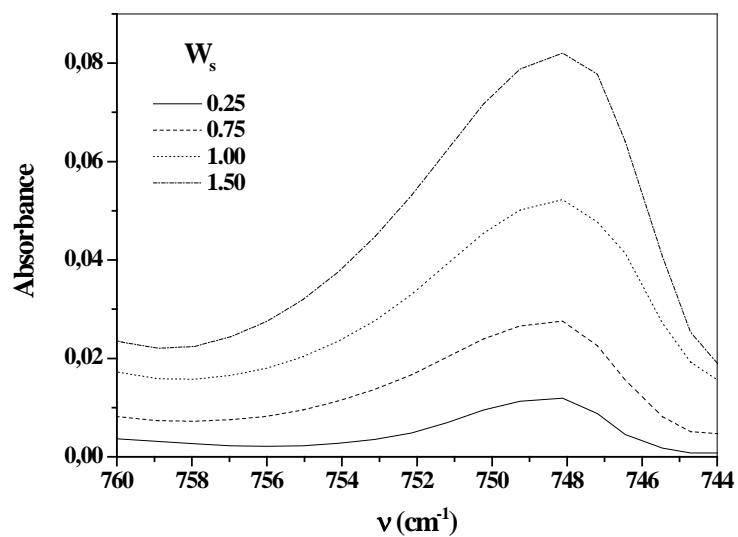

**Figure S1.** FT-IR spectra of [bmim][Tf<sub>2</sub>N] inside AOT/chlorobenzene RMs at different W<sub>s</sub> values, in the region of 760-740 cm<sup>-1</sup> (ν<sup>S-N-S</sup>). [AOT] = 0.1 M. The chlorobenzene bands have been subtracted. IR Path length cell = 0.015 mm.

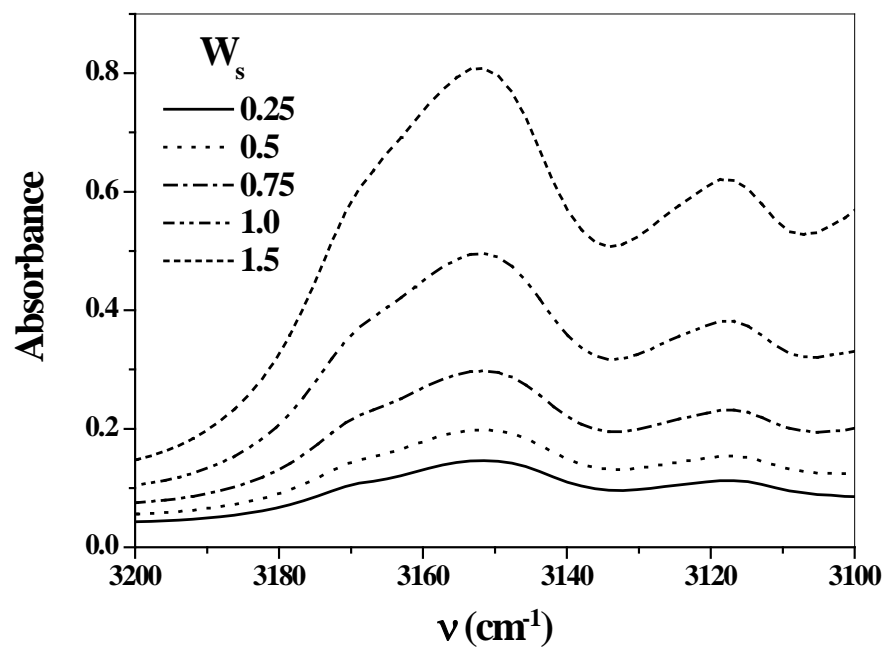

**Figure S2.** FT-IR spectra of [bmim][Tf<sub>2</sub>N] inside AOT/chlorobenzene RMs at different W<sub>s</sub> values, in the region of 3100-3200 cm<sup>-1</sup>. [AOT] = 0.1 M. The chlorobenzene bands have been subtracted. IR Path length cell = 0.5 mm.
